# Supplementary material for: Conformational stabilization of isatin Schiff bases – biologically active chemical probes
Source: Royal Society of Chemistry journal article supplement (doi:10.1039/c6ra26779c), 2017-01-01
Supplement: c6ra26779c1.pdf [file c6ra26779c1.pdf]

## SUPPORTING INFORMATION

### CONFORMATIONAL STABILIZATION OF ISATIN SCHIFF BASES – BIOLOGICALLY ACTIVE CHEMICAL PROBES

Andrey S. Smirnov<sup>a,b</sup>, Dmitry N. Nikolaev<sup>c</sup>, Vlad V. Gurzhiy<sup>b</sup>, Sergey N. Smirnov<sup>b</sup>, Vitaliy S.

Suslonov<sup>b</sup>, Alexander V. Garabadzhiu<sup>a</sup>, and \*Pavel B. Davidovich<sup>a</sup>

davidovich.pavel@technolog.edu.ru

<sup>a</sup>St. Petersburg Technological Institute; 26, Moskovskii av., St. Petersburg, 190013, Russia.

<sup>b</sup>St. Petersburg State University, University emb. 7/9, St. Petersburg, 199034, Russia.

<sup>c</sup>Research Institute of Experimental Medicine, 12 Akad. Pavlova str., St. Petersburg, 197376, Russia.

## TABLE OF CONTENTS

|                      |    |
|----------------------|----|
| 1. METHODS .....     | 2  |
| 2. SYNTHESIS .....   | 3  |
| 3. X-RAY .....       | 6  |
| 4. NMR SPECTRA ..... | 10 |
| 5. MS SPECTRA .....  | 15 |
| 6. REFERENCES .....  | 17 |

## 1. METHODS

**XRD.** Crystal structures of **I** – **VI** were determined by the means of single crystal X-ray diffraction analysis. Crystal of **I** and **IV** were fixed on a micro mounts, placed on a Rigaku Oxford Diffraction Supernova Atlas diffractometer and measured at a temperature of 100K using microfocused monochromated  $\text{CuK}\alpha$  radiation. Crystal of **V** was fixed on a micro mount, placed on a Rigaku Oxford Diffraction Supernova Atlas diffractometer and measured at a temperature of 100K using microfocused monochromated  $\text{MoK}\alpha$  radiation. Crystals of **II**, **III** and **VI** were fixed on a micro mounts, placed on a Rigaku Oxford Diffraction Excalibur Eos diffractometer and measured at a temperature of 100K using monochromated  $\text{MoK}\alpha$  radiation. The unit cell parameters and refinement characteristics for the crystal structures of **I** – **VI** are given in the Table S1. Empirical absorption correction for **I** – **VI** was applied in CrysAlisPro<sup>1</sup> program complex using spherical harmonics, implemented in SCALE3 ABSPACK scaling algorithm. The structures were solved by direct methods and refined using the *SHELXL* program<sup>2</sup> incorporated in the *OLEX2* program package<sup>3</sup>. Twin refinement of the crystal structure **VI** by means of the *SHELXL* HKLF 5 instruction, which precludes merging of the data as part of the refinement process, was used. The final models included coordinates and anisotropic displacement parameters for all non-hydrogen atoms. The carbon-bound H atoms were placed in calculated positions and were included in the refinement in the ‘riding’ model approximation, with  $U_{\text{iso}}(\text{H})$  set to  $1.5U_{\text{eq}}(\text{C})$  and C–H 0.96 Å for the  $\text{CH}_3$  groups,  $U_{\text{iso}}(\text{H})$  set to  $1.2U_{\text{eq}}(\text{C})$  and C–H 0.98 Å for the tertiary CH groups and  $U_{\text{iso}}(\text{H})$  set to  $1.2U_{\text{eq}}(\text{C})$  and C–H 0.93 Å for the CH groups in cyclic fragments. Supplementary crystallographic data for this paper have been deposited at Cambridge Crystallographic Data Centre (CCDC 1505866, 1505868, 1505867, 1505870, 1506944, and 1505869 for **I** – **VI**, respectively) and can be obtained via [www.ccdc.cam.ac.uk/data\\_request/cif](http://www.ccdc.cam.ac.uk/data_request/cif). X-ray powder diffraction spectra were recorded on a Bruker D2 Phaser diffractometer. The **FT-IR** spectra were recorded using pellets with KBr in the range 4000–400  $\text{cm}^{-1}$  on a Shimadzu IR-Affinity-1 spectrometer. **UV-Vis spectra** were recorded in 1 cm quartz cuvette on a Shimadzu UV-1800 spectrophotometer on 1 nm resolution in the range from 190 to 1100 nm. **NMR.** All  $^1\text{H}$  and  $^{13}\text{C}$  NMR spectra were recorded on a Bruker Avance III spectrometer at 400.13 and 100.61 MHz. **MS-spectra** were recorded in a positive mode in the range of 100-1000 m/z with ESI ionization type with on a Shimadzu Maxima-Resonance spectrometer. **DFT calculations.** Were performed using Gaussian 09 software package<sup>4</sup> with CAM-B3LYP and cc-PVTZ basis set. The calculation of vibrational frequencies was performed to confirm that all optimized structures are in the local minima on the potential energy surface.

## 2. SYNTHESIS

All necessary chemicals were of analytical grade (Sigma) and were used without further purification, unless otherwise stated. 4,7-dimethyl isatin was purchased from LifeChemicals. Molecular sieves 3Å were dried under vacuum at 250°C for 20 hours. Ethanol was stored with freshly dried molecular sieves. DMF distilled over MgSO<sub>4</sub> *in vacuo*.

### 1-methylisatin

To a solution of 50 g isatin (340 mmol) in anhydrous DMF (500 mL) was added during 1.5 h portion-wise 60% suspension of 15 g (370 mmol) of sodium hydride in mineral oil. After 45 min exposition at 20°C to the reaction mixture 23.25 mL (370 mmol) of methyl iodide was dropwise (~ 2 h) added. The reaction was performed at 4°C during the addition of sodium hydride and methyl iodide. Reaction mixture was stirred at RT overnight, and then DMF was evaporated *in vacuo*. The residue obtained was worked up with water (200 ml), formed precipitate was filtered off and recrystallized from ethanol to give 37 g (230 mmol) of red needle-like crystals. Yield 67%. M.p. 132-134 °C. <sup>1</sup>H NMR, δ, ppm: 7.60-7.54 (m, 2H), 7.12-7.08 (m, 1H), 6.88 (d, 1H), 3.22 (s, 3H).

**1,4,7-trimethylisatin** was prepared by the analogy with 1-methylisatin. M.p. 169-172 °C. <sup>1</sup>H NMR, δ, ppm: 7.17-7.15 (d, 1H), 6.77-6.75 (d, 1H), 3.49 (s, 3H), 2.51 (s, 6H).

### 1-methyl-3(phenylimino)indolinone-2-one (I)

In a round bottom flask equipped with Dean-Stark receiver the solution of 3.0 g (18.5 mmol) N-methyl-isatin, 2.2 mL (25 mmol) aniline and catalytic amount of PTSA in 60 mL of toluene was refluxed for 6 h. The reaction mixture was cooled, washed with water, dried over MgSO<sub>4</sub> and solvent evaporated in vacuum. The product was eluted on silica gel with chloroform and chloroform-methanol 9/1. The eluent was evaporated. The precipitate was crystallized first time from ethanol. Yield ~80 %. Prismatic orange crystals suitable for the X-ray diffraction analysis were obtained after crystallization from ethanol at 4 °C. M.p. 148-149 °C. Elemental analysis: calculated for C<sub>15</sub>H<sub>12</sub>N<sub>2</sub>O, C 76.25, H 5.12, N 11.86; estimated C 76.23, H 4.64, N 11.72. IR (KBr) ν, cm<sup>-1</sup>: 1734 (ν<sub>C=O</sub>), 1653 (ν<sub>C=N</sub>), 1605, 1587, 1483, 1468, 1421, 1371, 1333, 1258, 1227, 1159, 1121, 1098, 1072, 1055, 1024, 980, 918, 880, 862, 783, 752, 721, 698, 590, 534, 515, 465. <sup>1</sup>H NMR, δ, ppm: 7.44-7.40 (t, 2H), 7.37-7.34 (t, 1H), 7.26-7.22 (t, 1H), 7.01-6.99 (d, 2H) 6.86-6.84 (d, 1H), 6.67-6.63 (t, 1H) 6.62-6.60 (d, 1H), 3.30 (s, 3H). <sup>13</sup>C NMR (CDCl<sub>3</sub>), δ, ppm: 163.2, 154.4, 150.3, 148.0, 134.2, 133.9, 129.4, 128.5, 126.1, 125.3, 125.1, 123.2, 123.0, 122.7, 118.9, 117.8, 115.6, 110.0, 109.3, 108.7, 26.3, 25.8. MS (ESI), m/z: 237.102, 238.106, 239.109, 417.207, 495.180.

### 1,4,6-trimethyl-3(phenylimino)indolinone-2-one (II)

In the round bottom flask equipped with Soxhlet adaptor filled with 3 Å Molecular Sieves the mixture composed of 1,4,7-trimethylindoline-2,3-dione 0.5 g (2.6 mmol), aniline 0.28 g (2.9 mmol) and catalytic amount of PTSA in 40 mL of ethanol was refluxed for 3 h. The reaction mixture was cooled, solvent was evaporated. The residue was subjected to column chromatography using DCM as eluent. Finally, 0.25 g (35%) of title compound was isolated as orange solid. M.p. 140-143°C. Elemental analysis: calculated for C<sub>17</sub>H<sub>16</sub>N<sub>2</sub>O, C 77.25, H 6.10, N 10.60; estimated 77.04, H 6.04, N 10.30. IR (KBr)  $\nu$ , cm<sup>-1</sup>: 1715, 1700, 1696, 1689, 1685, 1593, 1576, 1558. <sup>1</sup>H NMR,  $\delta$ , ppm: 7.40-7.36 (t, 2H), 7.18-7.16 (m, 1H), 7.08-7.06 (d, 1H), 6.96-6.94 (m, 2H), 6.83-6.81 (d, 1H), 3.41 (s, 3H), 2.61 (s, 3H), 2.53 (s, 3H). <sup>13</sup>C NMR (CDCl<sub>3</sub>),  $\delta$ , ppm: 18.9, 19.3, 29.2, 117.7, 118.1, 119.0, 124.4, 126.0, 128.6, 136.9, 144.5, 150.5, 153.4, 158.1. MS (ESI), m/z: [M+Na]<sup>+</sup> 212.070.

### 1,4,6-trimethyl-3(2,6-diisopropyl-phenylimino)indolinone-2-one (III)

In the round bottom flask equipped with Dean-Stark receiver the solution of 3.0 g (18.5 mmol) N-methyl-isatin, 2.2 mL (25 mmol) of 2,6-diisopropylaniline and catalytic amount of PTSA in 60 mL of ethanol was refluxed for 6 h. The reaction mixture was cooled, washed with water, dried over MgSO<sub>4</sub> and solvent evaporated in vacuum. The product was eluted on silica gel with chloroform and chloroform-methanol 9/1. The eluent was evaporated. The precipitate was crystallized first time from ethanol at 4 °C. Yield ~80 %. M.p. 205-207 °C. Elemental analysis: calculated for C<sub>23</sub>H<sub>28</sub>N<sub>2</sub>O, C 79.27, H 8.10, N 8.04; estimated C 79.33, H 8.08, N 8.24. IR (KBr)  $\nu$ , cm<sup>-1</sup>: 1734 ( $\nu_{C=O}$ ), 1653 ( $\nu_{C=N}$ ), 1605, 1587, 1483, 1468, 1421, 1371, 1333, 1258, 1227, 1159, 1121, 1098, 1072, 1055, 1024, 980, 918, 880, 862, 783, 752, 721, 698, 590, 534, 515, 465. <sup>1</sup>H NMR,  $\delta$ , ppm: 7.18-7.16 (m, 2H), 7.12-7.08 (m, 2H), 6.88-6.86 (d, 1H), 3.41 (s, 3H), 2.73 (sep, 2H), 2.68 (s, 3H), 2.56 (s, 3H), 1.17 (d, 6H), 1.12 (d, 6H). <sup>13</sup>C NMR (CDCl<sub>3</sub>),  $\delta$ , ppm: 157.5, 154.5, 147.1, 145.0, 136.9, 136.6, 133.5, 125.9, 123.7, 122.8, 118.5, 117.8, 29.3, 28.5, 23.1, 19.4, 18.9. MS (ESI), m/z: [M+Na]<sup>+</sup> 371.211.

### [Cd(L)]Br<sub>2</sub> (V)

First, 100 mg (0.42 mmol) of **I** was dissolved in 5 mL of ethanol. Then gradually during 60 min 1.5 mL of ethanoic solution containing 58 mg (0.21 mmol) of CdBr<sub>2</sub> was added to **I**. After the final aliquot addition, the resulting solution was filtered and left overnight at ambient temperature to form needle-like crystals. Yield 66 %. Decomposition above 250 °C. Elemental analysis: calculated for C<sub>15</sub>H<sub>12</sub>Br<sub>2</sub>CdN<sub>2</sub>O, C 35.43, H 2.38, N 5.51; estimated C 36.16, H 2.40, N 5.44. IR (KBr)  $\nu$ , cm<sup>-1</sup>: 1707, 1607, 1485, 1469, 1448, 1382, 1339, 1128, 1109, 890, 768, 698. MS (ESI), m/z: [Cd(L)Br]<sup>+</sup> 428.92, [Cd(L)<sub>2</sub>Br]<sup>+</sup> 665.01.

## **[Hg(L)]Br<sub>2</sub> (VI)**

Compound **VI** was prepared by the analogy with **V** using HgBr<sub>2</sub> as a metal source. Yield 60 %. M.p. 178–181 °C. Elemental analysis: calculated for C<sub>15</sub>H<sub>12</sub>Br<sub>2</sub>HgN<sub>2</sub>O, C 30.19, H 2.03, N 4.70; estimated C 30.38, H 1.75, N 4.60. IR (KBr)  $\nu$ , cm<sup>-1</sup>: 1708, 1655, 1607, 1485, 1469, 1448, 1423, 1377, 1337, 1227, 1068, 1024, 1003, 885, 756, 792, 781. <sup>1</sup>H NMR (CDCl<sub>3</sub>),  $\delta$ , ppm: 3.35 (s, 3H), 6.74–6.76 (d, 1H), 6.83–6.87 (t, 1H), 6.92–6.94 (d, 1H), 7.18–7.20 (d, 2H), 7.35–7.39 (t, 2H), 7.44–7.52 (m, 3H). <sup>13</sup>C NMR (CDCl<sub>3</sub>),  $\delta$ , ppm: 27.1, 110.5, 115.5, 119.1, 124.0, 127.0, 127.4, 130.1, 135.9, 146.8, 148.4, 154.0, 164.0. MS (ESI), m/z: [Hg(L)Br]<sup>+</sup> 516.98, [Hg(L)<sub>2</sub>Br]<sup>+</sup> 753.08, [Hg(L)Br]<sup>+</sup> 516.98.

### 3. X-RAY

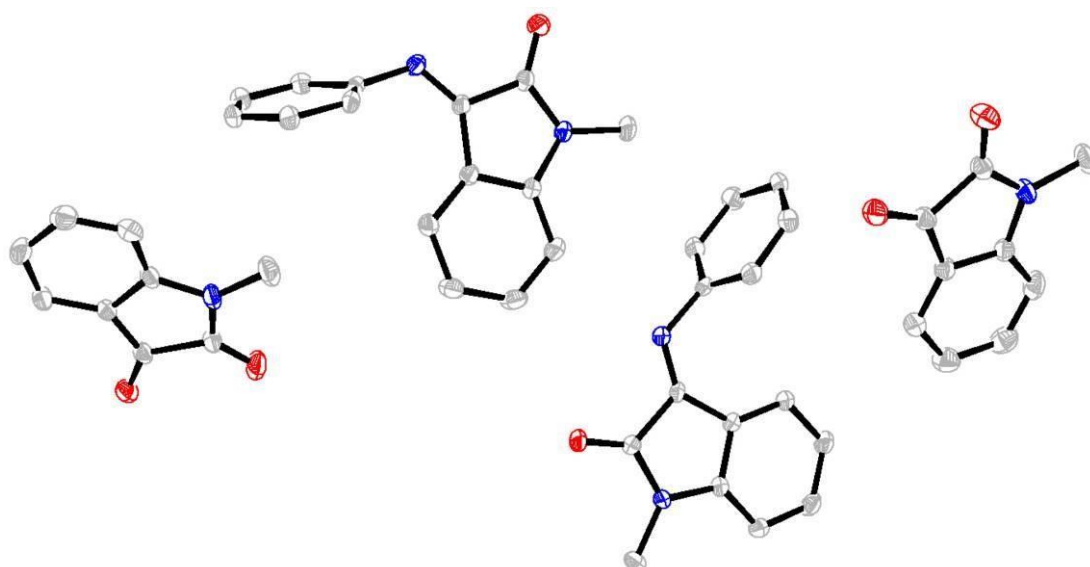

**Figure S1** ORTEP representation of mixed crystal structure (IV)

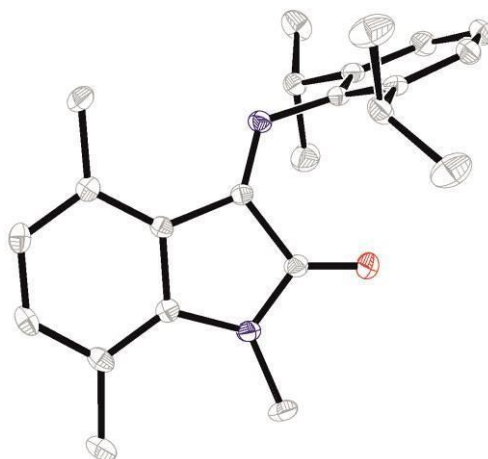

**Figure S2** ORTEP representation of X-ray resolved compound **III** molecular structure

**Table S1** Crystallographic and structure refinement data

| Compound                                                 | I                                                | II                                               | III                                              | IV                                                                                             | V                                                                  | VI                                                                                            |
|----------------------------------------------------------|--------------------------------------------------|--------------------------------------------------|--------------------------------------------------|------------------------------------------------------------------------------------------------|--------------------------------------------------------------------|-----------------------------------------------------------------------------------------------|
| CCDC #                                                   | 1505866                                          | 1505868                                          | 1505867                                          | 1505870                                                                                        | 1506944                                                            | 1505869                                                                                       |
| Formula                                                  | C <sub>15</sub> H <sub>12</sub> N <sub>2</sub> O | C <sub>17</sub> H <sub>16</sub> N <sub>2</sub> O | C <sub>23</sub> H <sub>28</sub> N <sub>2</sub> O | C <sub>15</sub> H <sub>12</sub> N <sub>2</sub> O·C <sub>9</sub> H <sub>7</sub> NO <sub>2</sub> | C <sub>15</sub> H <sub>12</sub> Br <sub>2</sub> CdN <sub>2</sub> O | C <sub>30</sub> H <sub>24</sub> Br <sub>4</sub> Hg <sub>2</sub> N <sub>4</sub> O <sub>2</sub> |
| Crystal System                                           | Monoclinic                                       | Monoclinic                                       | Monoclinic                                       | Triclinic                                                                                      | Triclinic                                                          | Monoclinic                                                                                    |
| <i>a</i> (Å)                                             | 9.4554(3)                                        | 10.2483(3)                                       | 8.5182(6)                                        | 7.8377 (2)                                                                                     | 7.2618(3)                                                          | 23.6723(11)                                                                                   |
| <i>b</i> (Å)                                             | 11.8767(3)                                       | 8.1749(2)                                        | 29.4795(14)                                      | 8.33995(19)                                                                                    | 11.2036(10)                                                        | 19.9737(5)                                                                                    |
| <i>c</i> (Å)                                             | 10.4401(2)                                       | 16.2529(6)                                       | 8.4782(5)                                        | 31.7116(6)                                                                                     | 20.2141(11)                                                        | 14.0418(4)                                                                                    |
| $\alpha$ (°)                                             | 90                                               | 90                                               | 90                                               | 85.8492(17)                                                                                    | 93.876(6)                                                          | 90                                                                                            |
| $\beta$ (°)                                              | 91.739(2)                                        | 102.182(3)                                       | 115.150(8)                                       | 85.7112(18)                                                                                    | 98.487(4)                                                          | 101.024(3)                                                                                    |
| $\gamma$ (°)                                             | 90                                               | 90                                               | 90                                               | 69.989(2)                                                                                      | 107.037(6)                                                         | 90                                                                                            |
| <i>V</i> (Å <sup>3</sup> )                               | 1171.88(5)                                       | 1330.99(8)                                       | 1927.1(2)                                        | 1939.83(8)                                                                                     | 1544.46(18)                                                        | 6516.8(4)                                                                                     |
| Molecular weight                                         | 236.27                                           | 264.32                                           | 348.47                                           | 397.42                                                                                         | 508.49                                                             | 1193.35                                                                                       |
| Space group                                              | <i>P</i> 2 <sub>1</sub> / <i>c</i>               | <i>P</i> 2 <sub>1</sub> / <i>c</i>               | <i>P</i> 2 <sub>1</sub> / <i>c</i>               | <i>P</i> -1                                                                                    | <i>P</i> -1                                                        | <i>P</i> 2 <sub>1</sub> / <i>c</i>                                                            |
| $\mu$ (mm <sup>-1</sup> )                                | 0.685                                            | 0.083                                            | 0.073                                            | 0.743                                                                                          | 6.587                                                              | 14.351                                                                                        |
| Temperature (K)                                          | 100(2)                                           | 100(2)                                           | 100(2)                                           | 100                                                                                            | 100                                                                | 100                                                                                           |
| <i>Z</i>                                                 | 4                                                | 4                                                | 4                                                | 4                                                                                              | 4                                                                  | 8                                                                                             |
| <i>D</i> <sub>calc</sub> (g/cm <sup>3</sup> )            | 1.339                                            | 1.319                                            | 1.201                                            | 1.361                                                                                          | 2.187                                                              | 2.433                                                                                         |
| Crystal size (mm <sup>3</sup> )                          | 0.35×0.28×0.21                                   | 0.18×0.10×0.06                                   | 0.19×0.12×0.04                                   | 0.19×0.14×0.09                                                                                 | 0.35×0.21×0.05                                                     | 0.21×0.13×0.06                                                                                |
| Radiation                                                | CuK $\alpha$                                     | MoK $\alpha$                                     | MoK $\alpha$                                     | CuK $\alpha$                                                                                   | MoK $\alpha$                                                       | MoK $\alpha$                                                                                  |
| Total reflections                                        | 5796                                             | 11162                                            | 15518                                            | 46094                                                                                          | 11894                                                              | 35683                                                                                         |
| Unique reflections                                       | 2277                                             | 3053                                             | 4310                                             | 7703                                                                                           | 11894                                                              | 13989                                                                                         |
| Angle range 2 $\theta$ (°)                               | 9.36-145.00                                      | 5.60-55.00                                       | 5.28-55.00                                       | 5.60-145.00                                                                                    | 5.96-50.00                                                         | 11.14-54.00                                                                                   |
| Reflections with $ F_o  \geq 4\sigma_F$                  | 2018                                             | 2689                                             | 3571                                             | 7226                                                                                           | 9405                                                               | 9725                                                                                          |
| <i>R</i> <sub>int</sub>                                  | 0.0196                                           | 0.0266                                           | 0.0284                                           | 0.0546                                                                                         | merged                                                             | 0.0713                                                                                        |
| <i>R</i> <sub><math>\sigma</math></sub>                  | 0.0194                                           | 0.0248                                           | 0.0307                                           | 0.0281                                                                                         | 0.0507                                                             | 0.1113                                                                                        |
| <i>R</i> <sub>1</sub> ( $ F_o  \geq 4\sigma_F$ )         | 0.0370                                           | 0.0377                                           | 0.0470                                           | 0.0608                                                                                         | 0.0685                                                             | 0.0676                                                                                        |
| <i>wR</i> <sub>2</sub> ( $ F_o  \geq 4\sigma_F$ )        | 0.0929                                           | 0.0924                                           | 0.0994                                           | 0.1443                                                                                         | 0.1938                                                             | 0.1179                                                                                        |
| <i>R</i> <sub>1</sub> (all data)                         | 0.0421                                           | 0.0434                                           | 0.0598                                           | 0.0637                                                                                         | 0.0824                                                             | 0.1071                                                                                        |
| <i>wR</i> <sub>2</sub> (all data)                        | 0.0970                                           | 0.0965                                           | 0.1053                                           | 0.1456                                                                                         | 0.2022                                                             | 0.1325                                                                                        |
| <i>S</i>                                                 | 1.051                                            | 1.037                                            | 1.070                                            | 1.203                                                                                          | 1.039                                                              | 1.127                                                                                         |
| $\rho_{\min}$ , $\rho_{\max}$ , <i>e</i> /Å <sup>3</sup> | -0.162, 0.251                                    | -0.218, 0.305                                    | -0.204, 0.299                                    | -0.273, 0.292                                                                                  | -1.914, 3.394                                                      | -1.708, 2.940                                                                                 |

$R_1 = \Sigma||F_o| - |F_c||/\Sigma|F_o|$ ;  $wR_2 = \{\Sigma[w(F_o^2 - F_c^2)^2]/\Sigma[w(F_o^2)^2]\}^{1/2}$ ;  $w = 1/[\sigma^2(F_o^2) + (aP)^2 + bP]$ , where  $P = (F_o^2 + 2F_c^2)/3$ ;  $s = \{\Sigma[w(F_o^2 - F_c^2)]/(n - p)\}^{1/2}$  where *n* is the number of reflections and *p* is the number of refinement parameters.

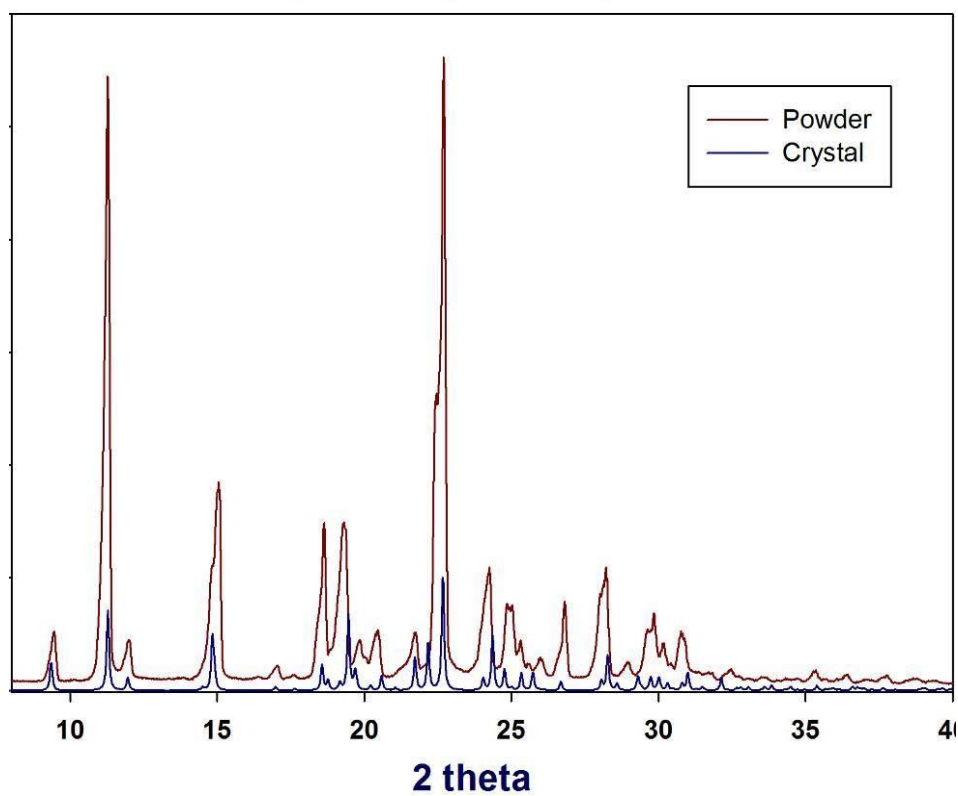

**Figure S3** Superimposed X-ray diffraction patterns for crystalline and powder compound **I**

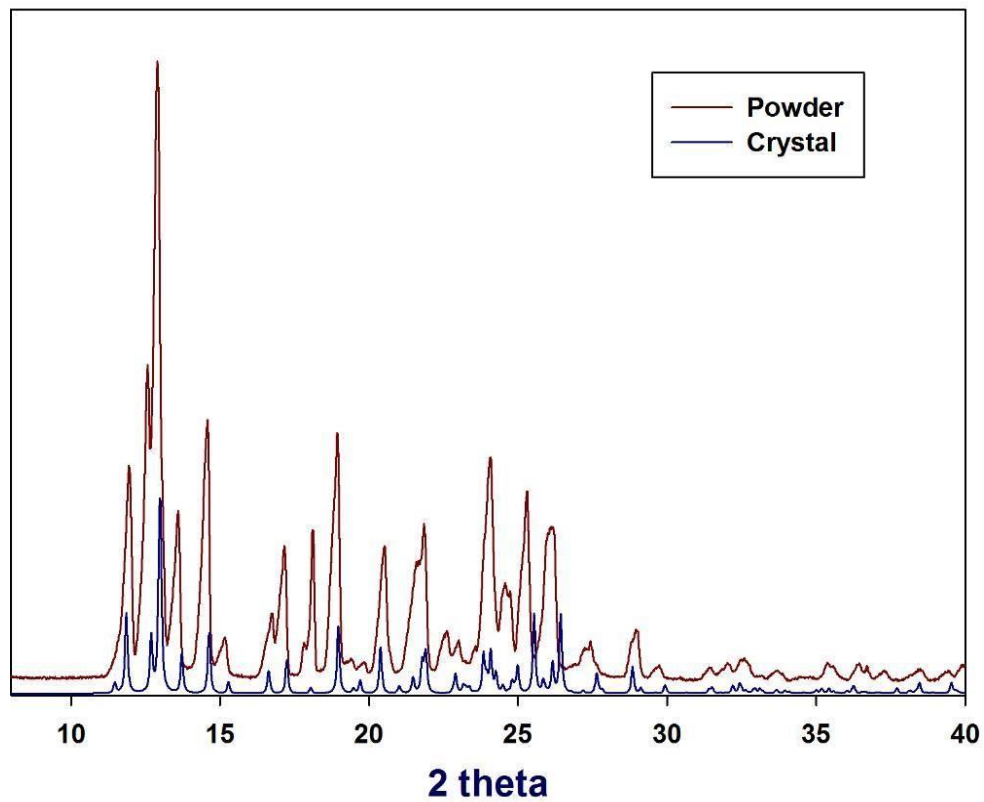

**Figure S4** Superimposed X-ray diffraction patterns for crystalline and powder compound **III**



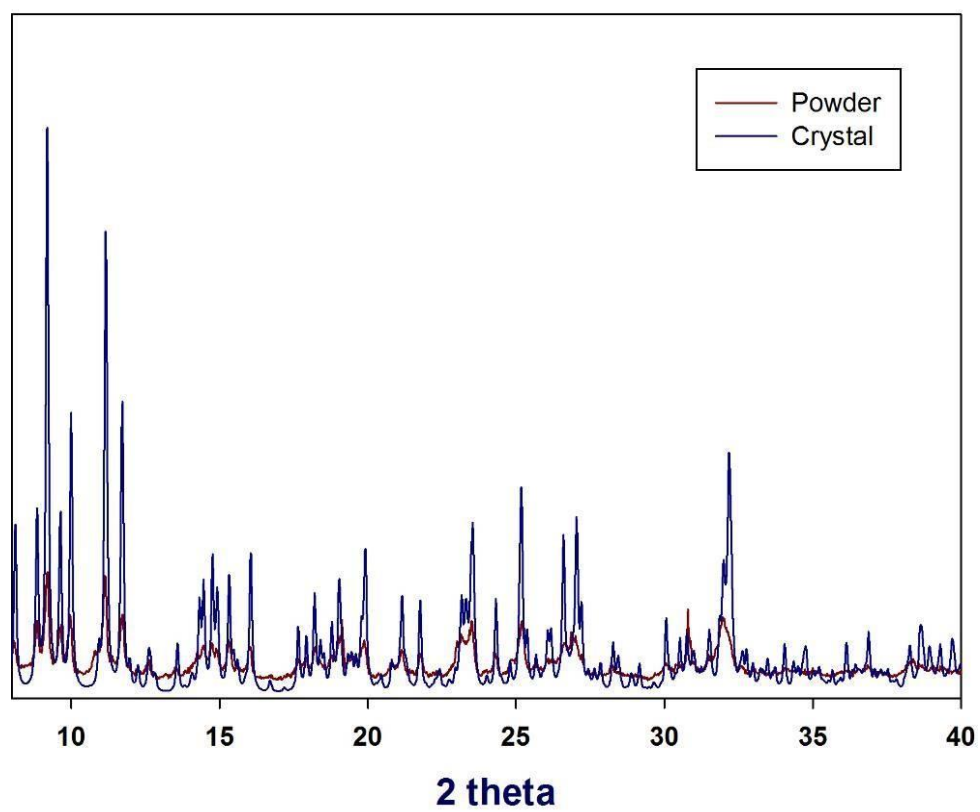

**Figure S5** Superimposed X-ray diffraction patterns for crystalline and powder compound **VI**

## 4. NMR SPECTRA

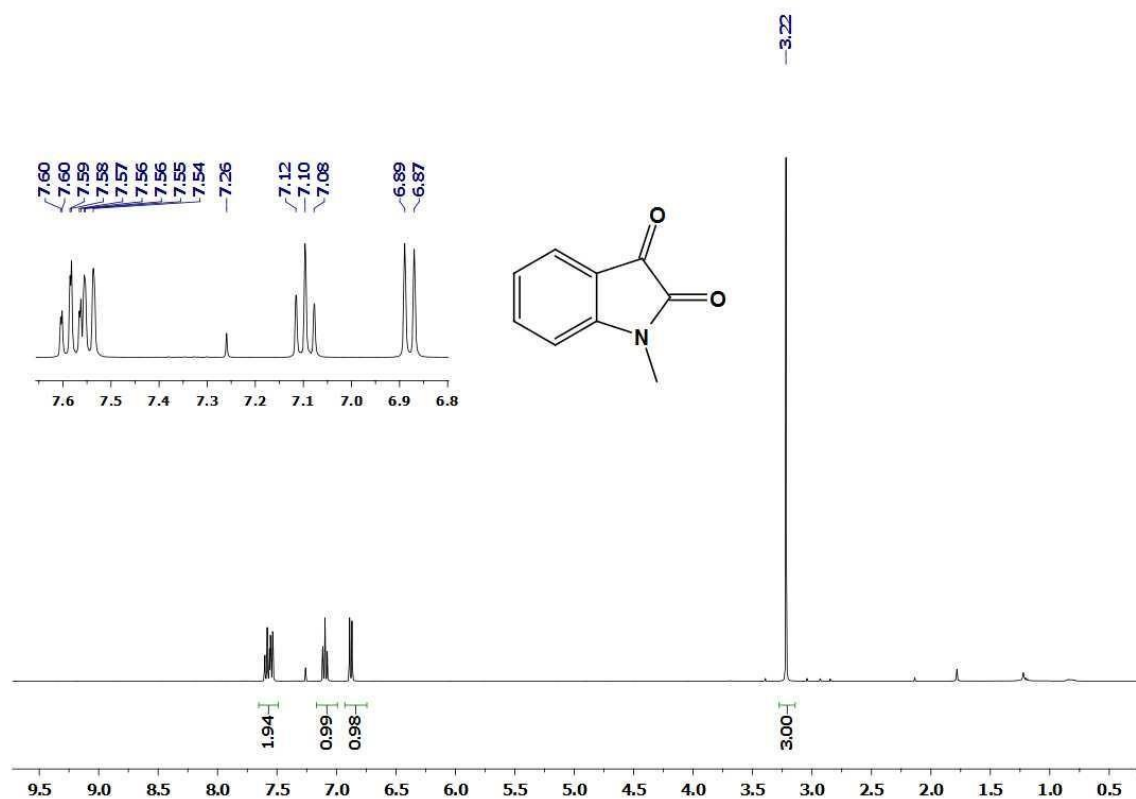

**Figure S6** 1-methyl-isatin <sup>1</sup>H NMR spectrum in CDCl<sub>3</sub>

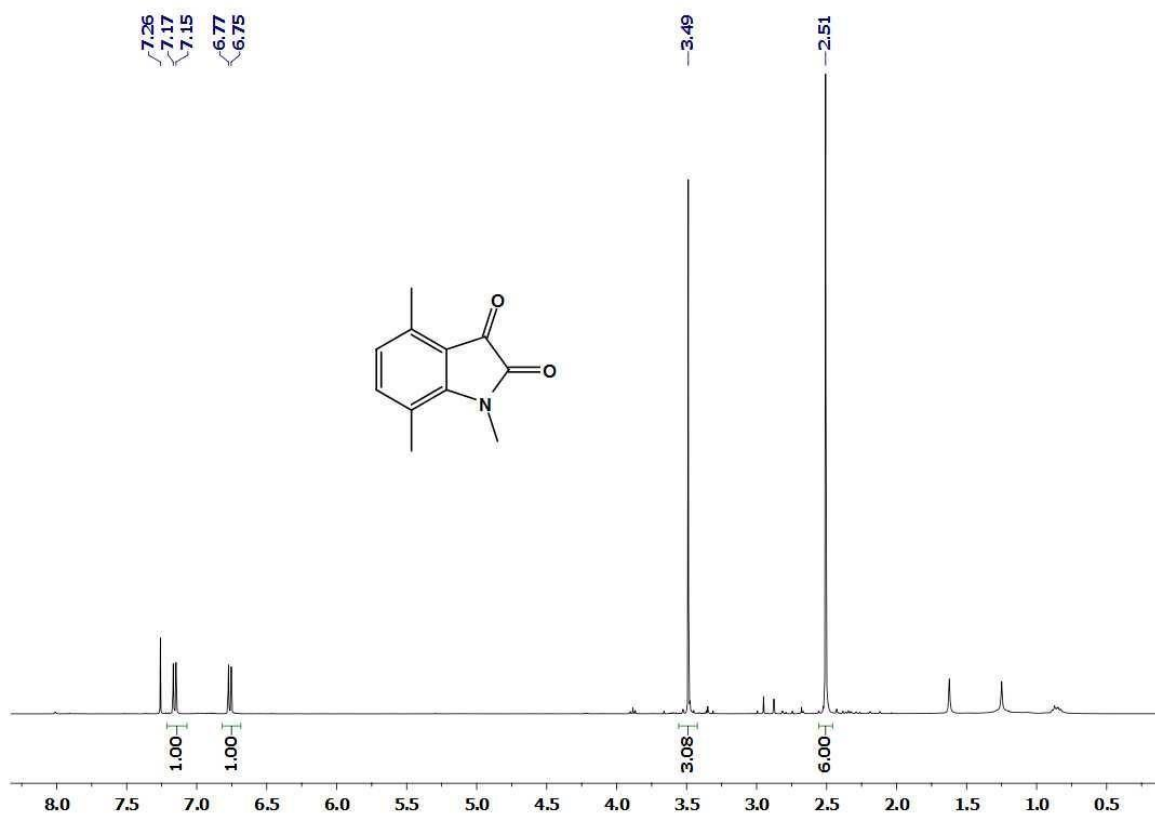

**Figure S7** <sup>1</sup>H NMR spectrum of 1,4,7-methyl-isatin in CDCl<sub>3</sub>

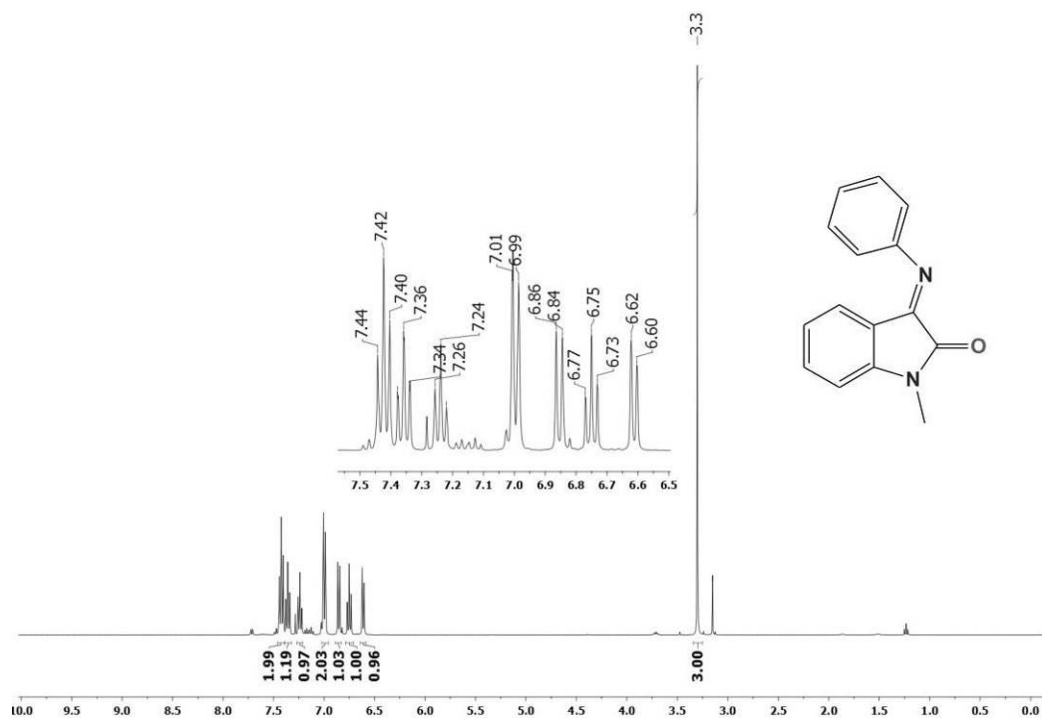

**Figure S8** <sup>1</sup>H NMR spectrum of **I** in CDCl<sub>3</sub>

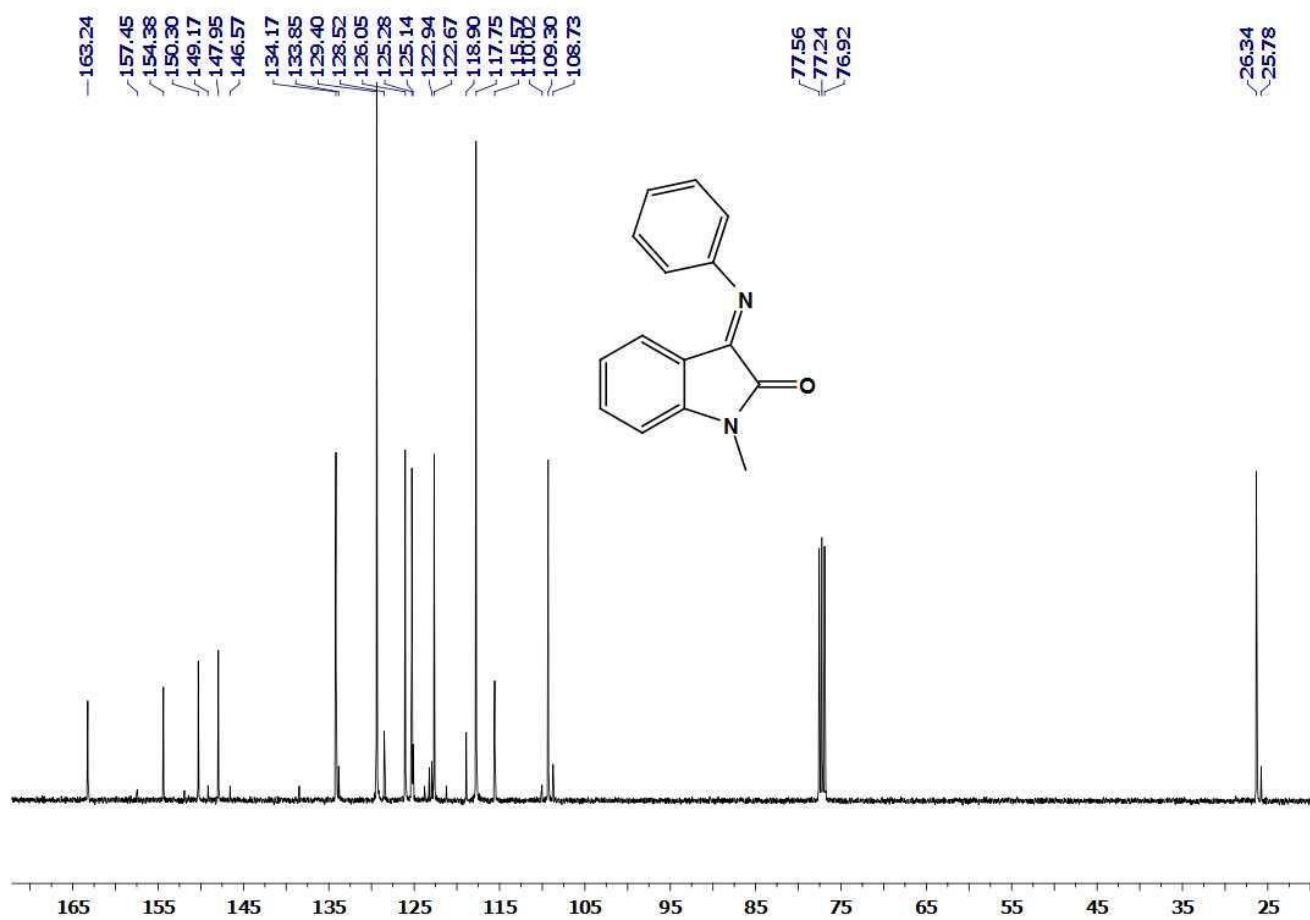

**Figure S9** <sup>13</sup>C NMR spectrum of **I** in CDCl<sub>3</sub>

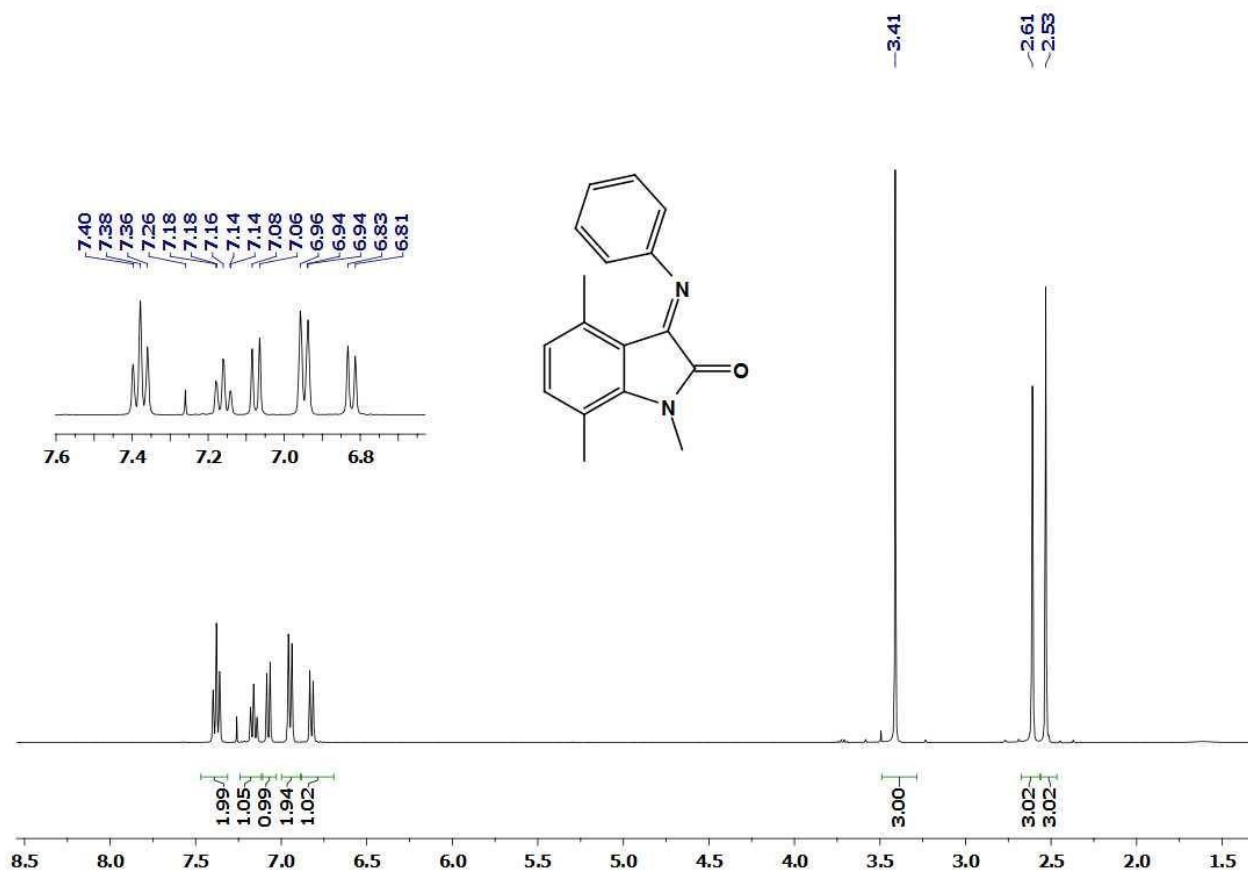

Figure S10 <sup>1</sup>H NMR spectrum of **II** in CDCl<sub>3</sub>

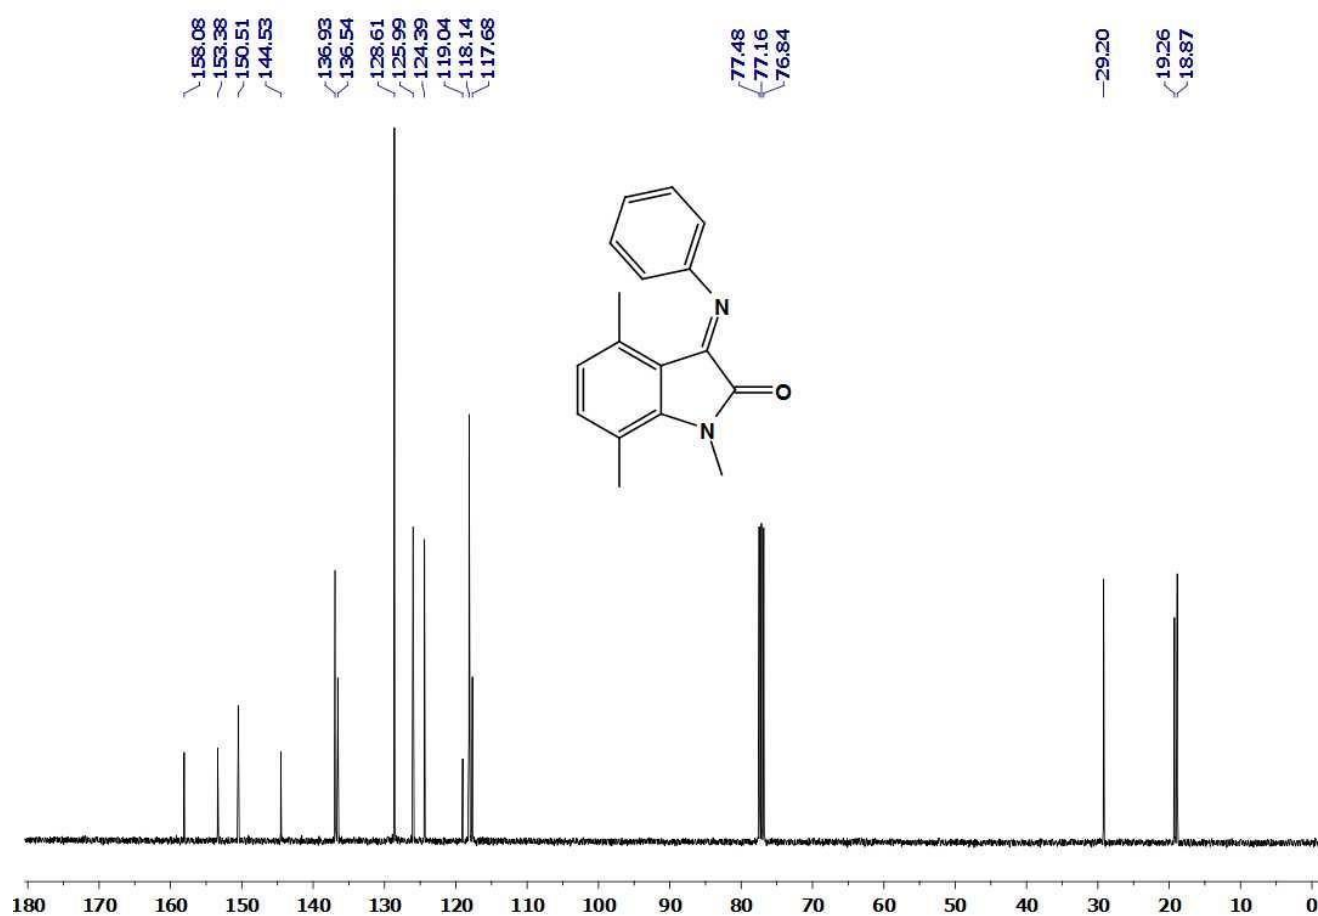

Figure S11 <sup>13</sup>C NMR spectrum of **II** in CDCl<sub>3</sub>

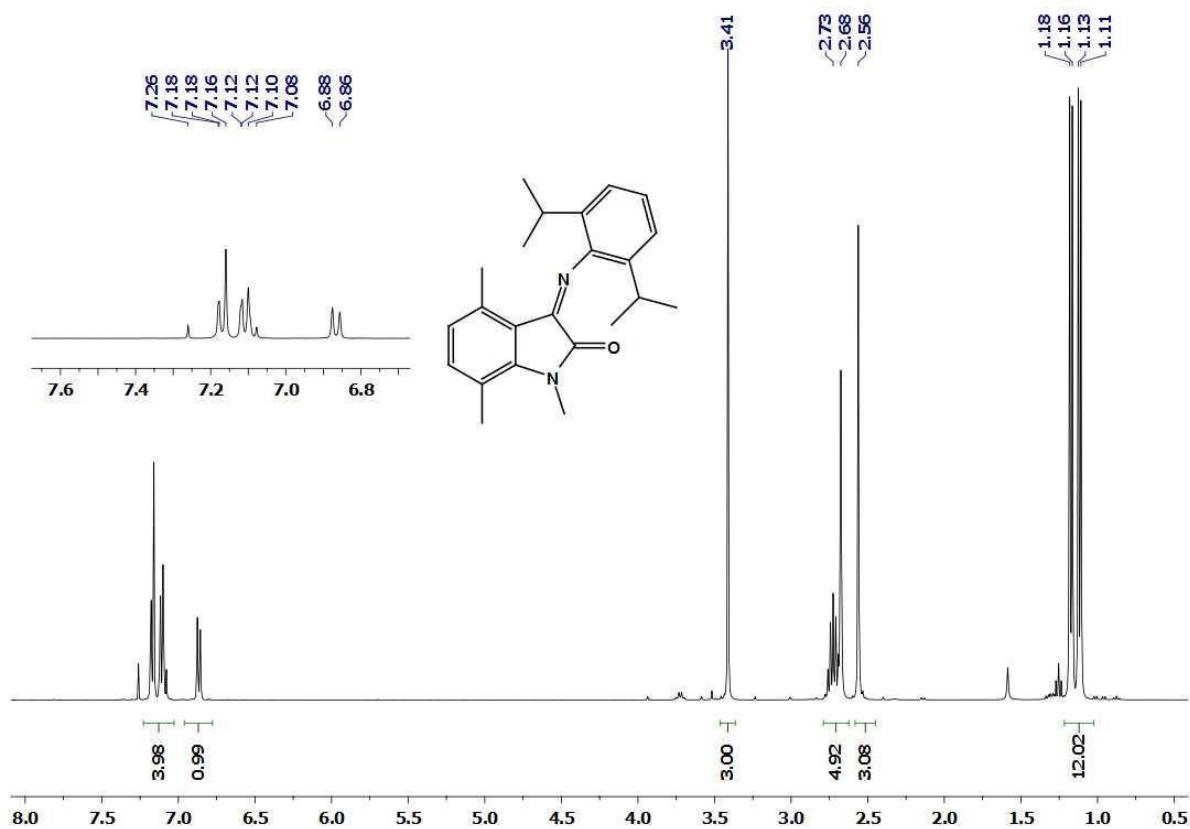

Figure S12 <sup>1</sup>H NMR spectrum of **III** in CDCl<sub>3</sub>

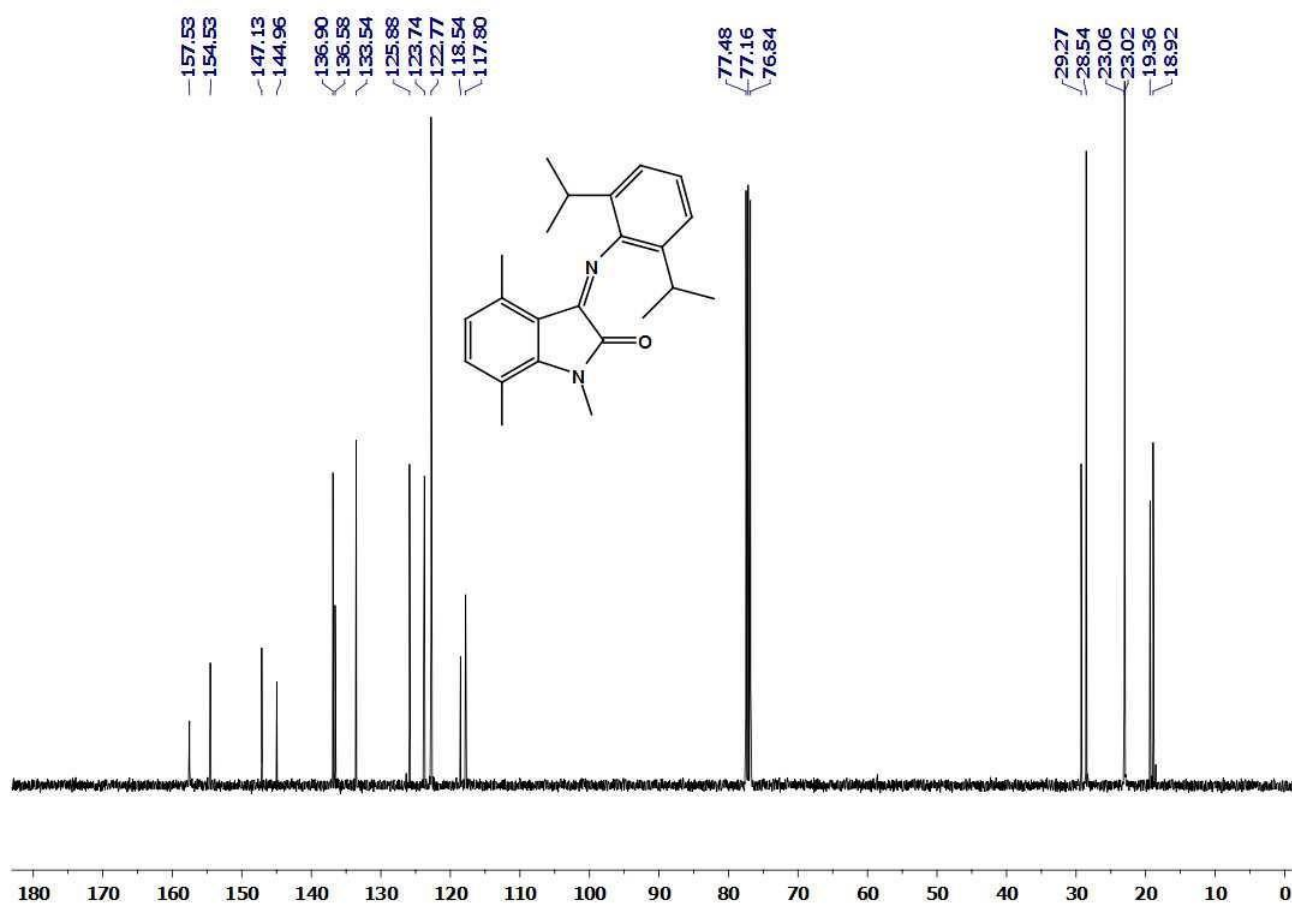

Figure S13 <sup>13</sup>C NMR spectrum of **III** in CDCl<sub>3</sub>

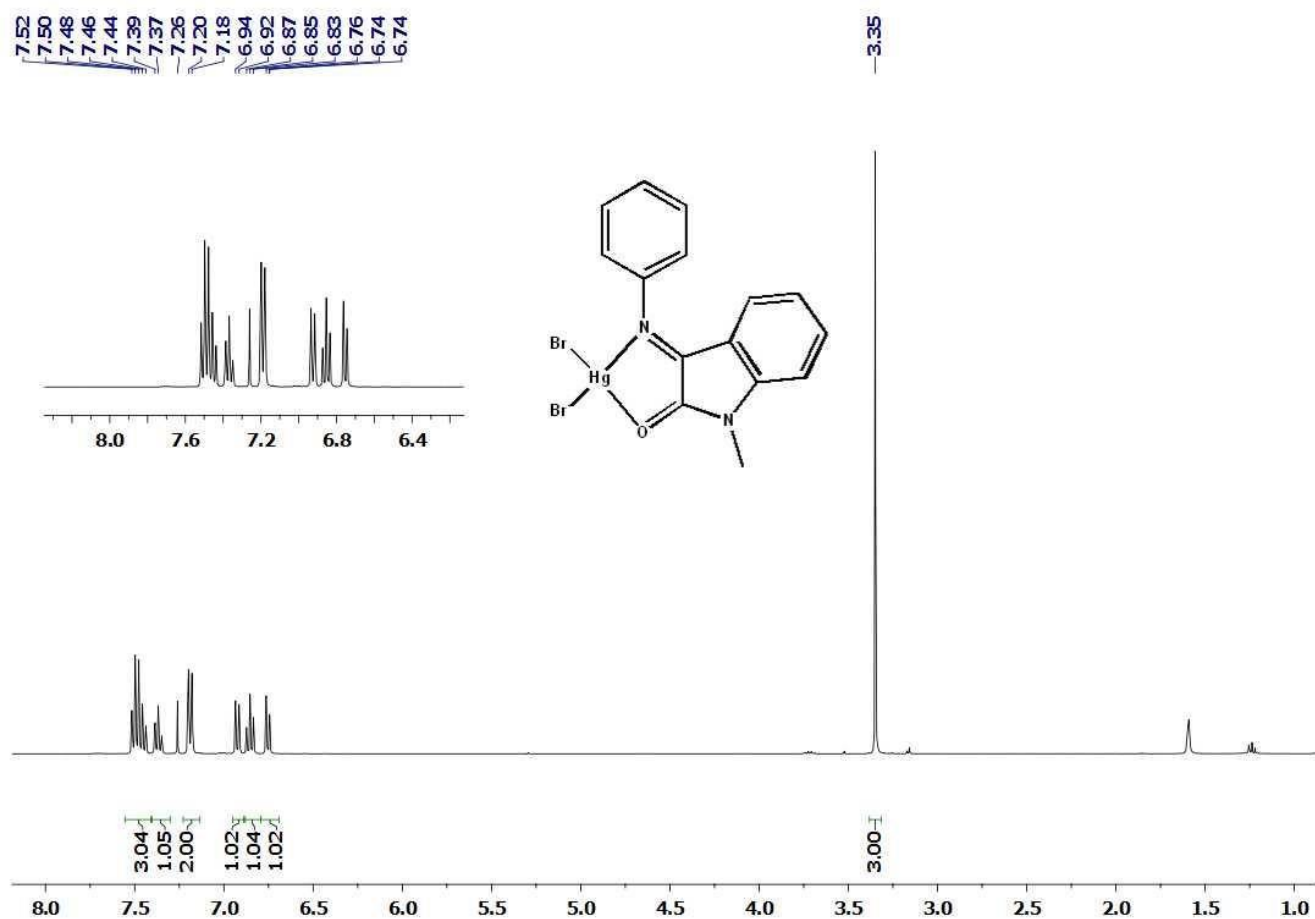

Figure S14 <sup>1</sup>H NMR spectrum of VI in CDCl<sub>3</sub>

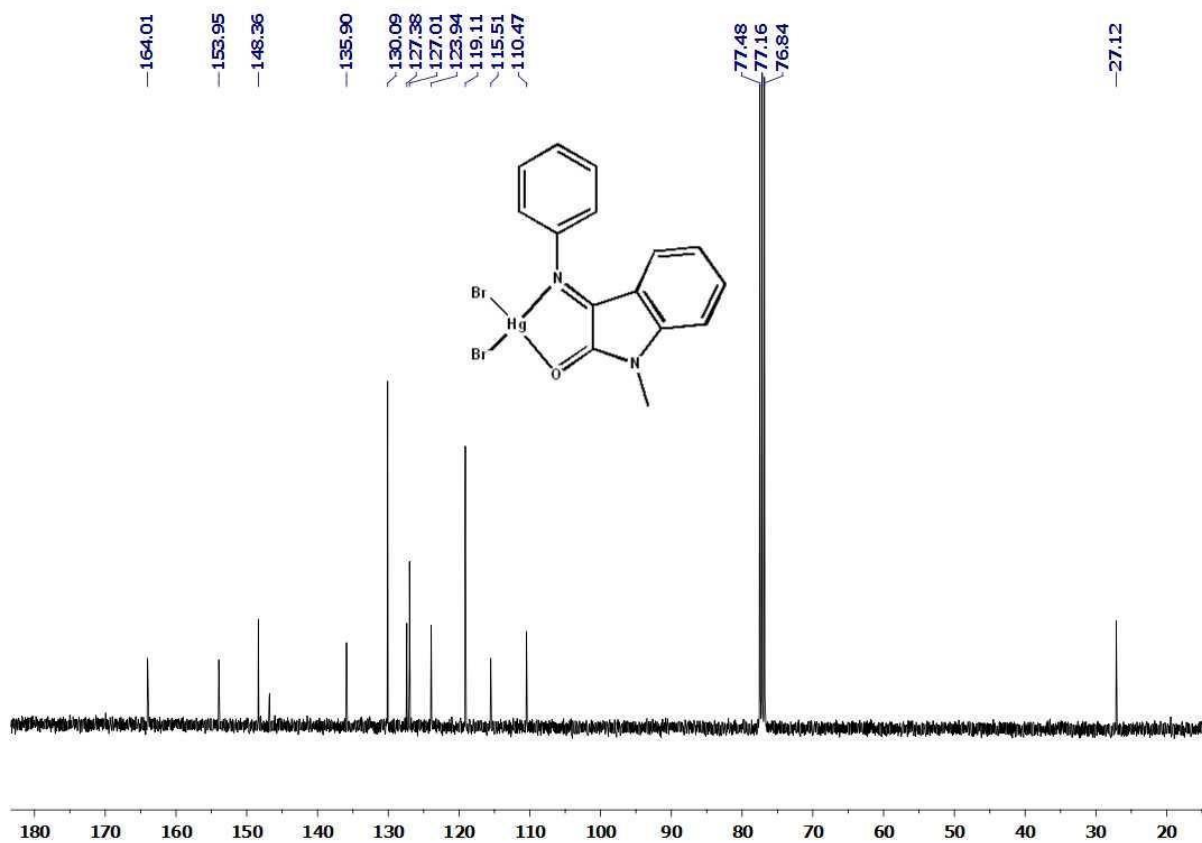

Figure S15 <sup>13</sup>C NMR spectrum of VI in CDCl<sub>3</sub>

## 5. MS SPECTRA

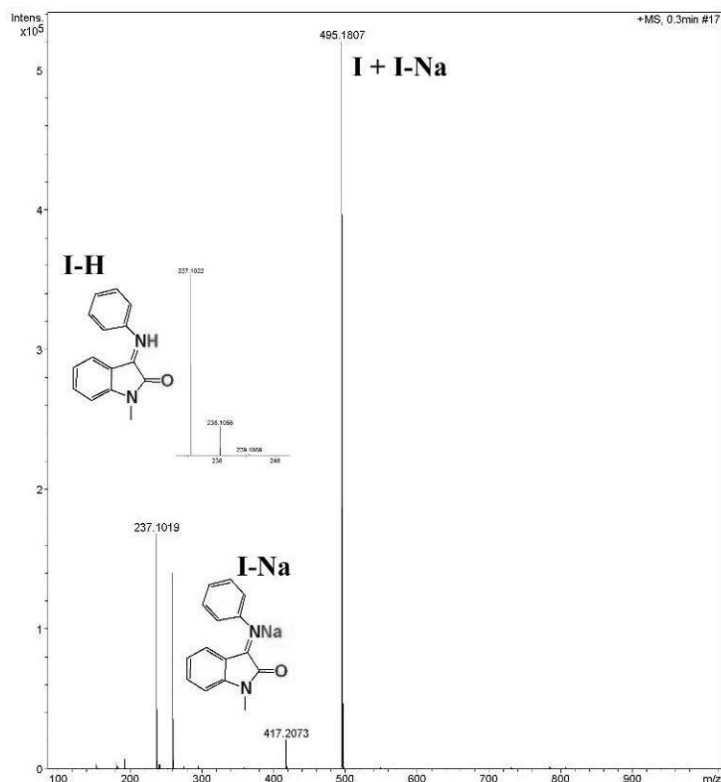

Figure S16 MS spectrum of **I** (MW = 236.27)

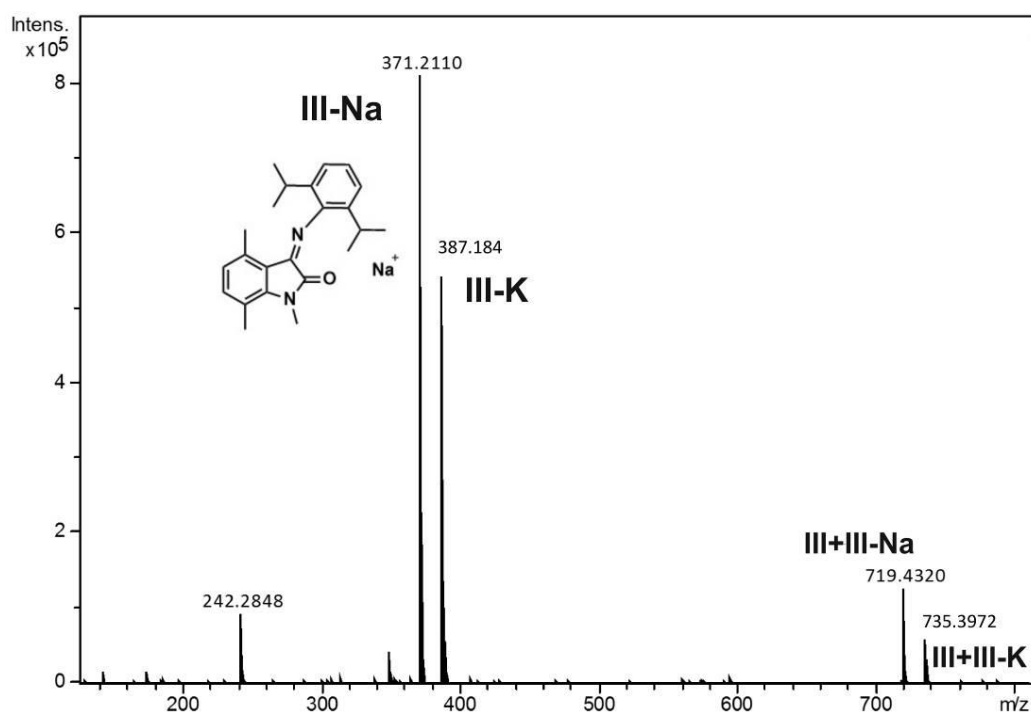

Figure S17 MS spectrum of **III** (MW = 348.22)

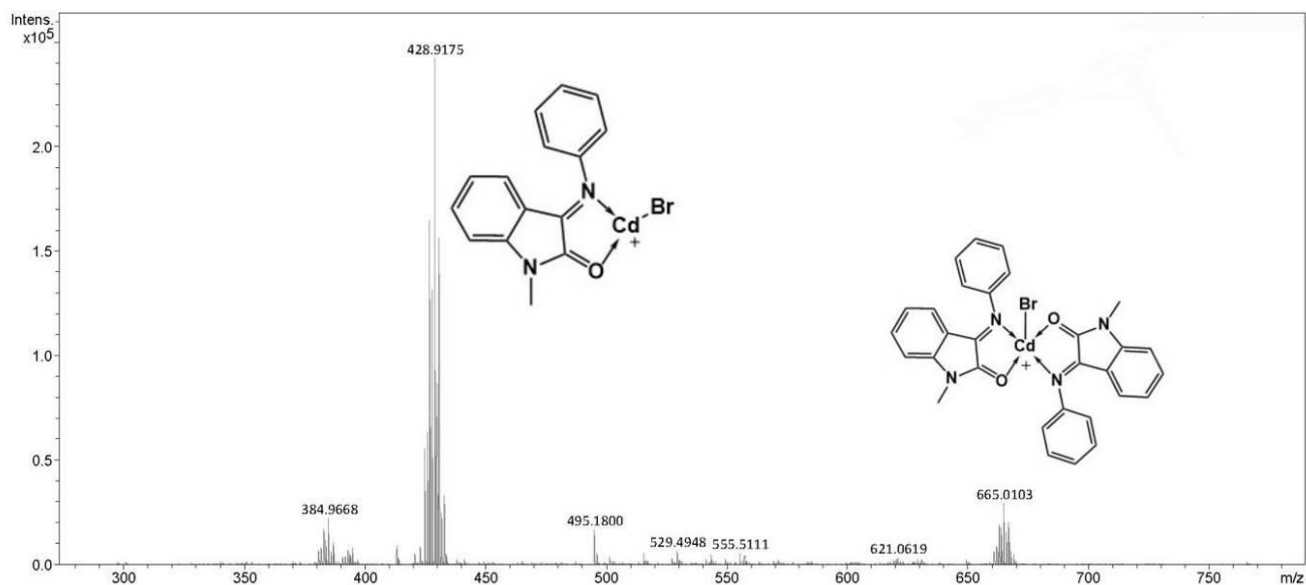

**Figure S18** MS spectra of **V** from MeOH/DSMO mixture

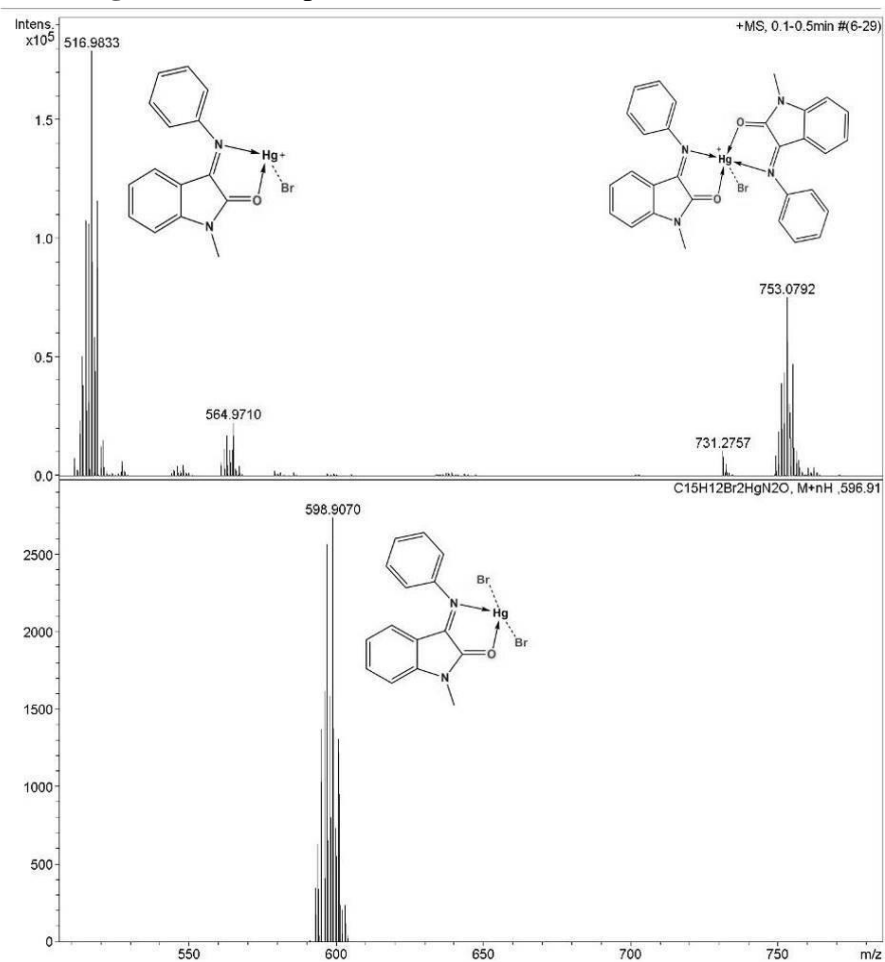

**Figure S19** MS spectra of **VI** (MW = 596.67)



## 6. REFERENCES

1. CrysAlisPro, A. T., Version 1.171.36.20 (release 27-06-2012).
2. Sheldrick, G., *Acta Crystallographica Section A* **2008**, *64*, 112-122.
3. Dolomanov, O. V.; Bourhis, L. J.; Gildea, R. J.; Howard, J. A. K.; Puschmann, H., *Journal of Applied Crystallography* **2009**, *42*, 339-341.
4. Frisch, M. J.; Trucks, G. W.; Schlegel, H. B.; Scuseria, G. E.; Robb, M. A.; Cheeseman, J. R.; Scalmani, G.; Barone, V.; Mennucci, B.; Petersson, G. A.; Nakatsuji, H.; Caricato, M.; Li, X.; Hratchian, H. P.; Izmaylov, A. F.; Bloino, J.; Zheng, G.; Sonnenberg, J. L.; Hada, M.; Ehara, M.; Toyota, K.; Fukuda, R.; Hasegawa, J.; Ishida, M.; Nakajima, T.; Honda, Y.; Kitao, O.; Nakai, H.; Vreven, T.; Montgomery, J. A.; Peralta, J. E.; Ogliaro, F.; Bearpark, M.; Heyd, J. J.; Brothers, E.; Kudin, K. N.; Staroverov, V. N.; Kobayashi, R.; Normand, J.; Raghavachari, K.; Rendell, A.; Burant, J. C.; Iyengar, S. S.; Tomasi, J.; Cossi, M.; Rega, N.; Millam, J. M.; Klene, M.; Knox, J. E.; Cross, J. B.; Bakken, V.; Adamo, C.; Jaramillo, J.; Gomperts, R.; Stratmann, R. E.; Yazyev, O.; Austin, A. J.; Cammi, R.; Pomelli, C.; Ochterski, J. W.; Martin, R. L.; Morokuma, K.; Zakrzewski, V. G.; Voth, G. A.; Salvador, P.; Dannenberg, J. J.; Dapprich, S.; Daniels, A. D.; Farkas, Foresman, J. B.; Ortiz, J. V.; Cioslowski, J.; Fox, D. J., Gaussian 09, Revision B.01. In Wallingford CT, 2009.
